# Supplementary material for: Development and validation of a risk prediction model and nomogram for colon adenocarcinoma based on methylation-driven genes
Source: publisher site journal article supplement (doi:10.18632/aging.203179), 2021-06-28
Supplement: Supplementary file [file aging-v13i12-203179-supplementary-material-SD1.pdf]

SUPPLEMENTARY FIGURE

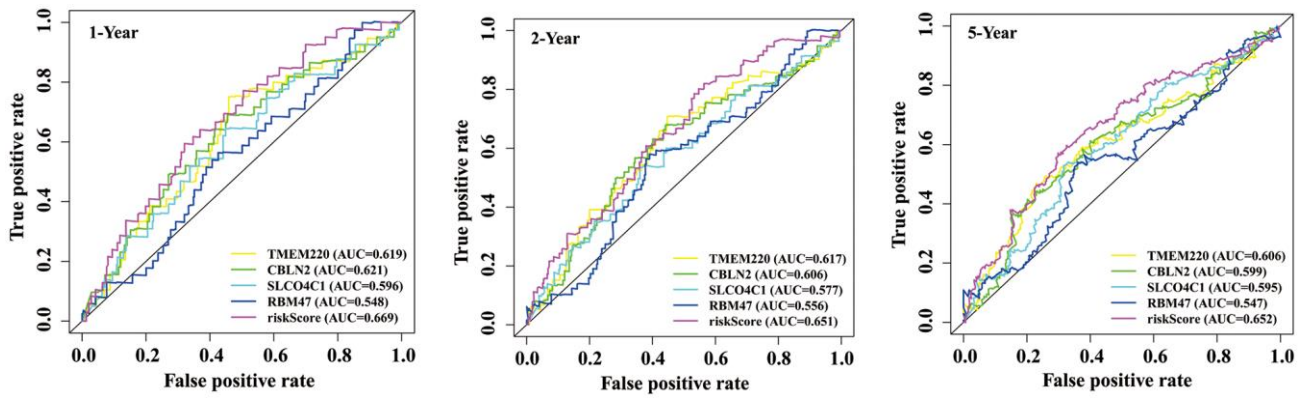

Supplementary Figure 1. Comparison of prognostic accuracy between 4 gene signature and single mRNAs.
