# Supplementary material for: Development and validation of a risk prediction model and nomogram for colon adenocarcinoma based on methylation-driven genes
Source: publisher site journal article supplement (doi:10.18632/aging.203179), 2021-06-28
Supplement: Supplementary file [file aging-v13i12-203179-supplementary-material-SD3.pdf]

## SUPPLEMENTARY TABLES

**Supplementary Table 2. KEGG pathway analysis for *CBLN2* by GSEA.**

| Expression                               | GS follow link to MSigDB                      | SIZE  | NES   | NOM p-value | RANK AT MAX |
|------------------------------------------|-----------------------------------------------|-------|-------|-------------|-------------|
| High                                     | KEGG_RENIN_ANGIOTENSIN_SYSTEM                 | 17    | 2.04  | 0           | 2832        |
|                                          | KEGG_NEUROACTIVE_LIGAND_RECEPTOR_INTERACTION  | 233   | 1.72  | 0.006       | 3336        |
|                                          | KEGG_TGF_BETA_SIGNALING_PATHWAY               | 85    | 1.64  | 0.012       | 4441        |
|                                          | KEGG_PENTOSE_AND_GLUCURONATE_INTERCONVERSIONS | 26    | 1.72  | 0.02        | 1987        |
|                                          | KEGG_CALCIIUM_SIGNALING_PATHWAY               | 170   | 1.58  | 0.029       | 3276        |
|                                          | KEGG_THYROID_CANCER                           | 29    | 1.5   | 0.042       | 2089        |
|                                          | KEGG_HEDGEHOG_SIGNALING_PATHWAY               | 54    | 1.53  | 0.049       | 2207        |
| Low                                      | KEGG_HOMOLOGOUS_RECOMBINATION                 | 26    | -1.81 | 0.014       | 3924        |
|                                          | KEGG_NUCLEOTIDE_EXCISION_REPAIR               | 44    | -1.74 | 0.014       | 2907        |
|                                          | KEGG_RNA_POLYMERASE                           | 28    | -1.69 | 0.023       | 3300        |
|                                          | KEGG_PROTEIN_EXPORT                           | 23    | -1.65 | 0.028       | 3135        |
|                                          | KEGG_PYRIMIDINE_METABOLISM                    | 96    | -1.68 | 0.034       | 4569        |
|                                          | KEGG_SPLICEOSOME                              | 126   | -1.72 | 0.036       | 4531        |
|                                          | KEGG_ONE_CARBON_POOL_BY_FOLATE                | 17    | -1.72 | 0.039       | 1513        |
| KEGG_ANTIGEN_PROCESSING_AND_PRESENTATION | 66                                            | -1.69 | 0.049 | 4709        |             |

**Supplementary Table 3. KEGG pathway analysis for *RBM47* by GSEA.**

| Expression | GS follow link to MSigDB                         | SIZE                                                    | NES  | NOM p-value | RANK AT MAX |      |
|------------|--------------------------------------------------|---------------------------------------------------------|------|-------------|-------------|------|
| High       | KEGG_LONG_TERM_POTENTIATION                      | 67                                                      | 1.89 | 0           | 2756        |      |
|            | KEGG_LYSINE_DEGRADATION                          | 42                                                      | 1.85 | 0.002       | 3723        |      |
|            | KEGG_VASOPRESSIN_REGULATED_WATER_REABSORPTION    | 42                                                      | 1.63 | 0.004       | 1880        |      |
|            | KEGG_VALINE_LEUCINE_AND_ISOLEUCINE_DEGRADATION   | 43                                                      | 1.89 | 0.006       | 2684        |      |
|            | KEGG_PROPANOATE_METABOLISM                       | 31                                                      | 1.87 | 0.006       | 4217        |      |
|            | KEGG_FATTY_ACID_METABOLISM                       | 41                                                      | 1.84 | 0.006       | 4437        |      |
|            | KEGG_STARCH_AND_SUCROSE_METABOLISM               | 46                                                      | 1.73 | 0.006       | 5073        |      |
|            | KEGG_OOCYTE_MEIOSIS                              | 107                                                     | 1.77 | 0.008       | 3220        |      |
|            | KEGG_TERPENOID_BACKBONE_BIOSYNTHESIS             | 14                                                      | 1.75 | 0.008       | 3277        |      |
|            | KEGG_COLORECTAL_CANCER                           | 62                                                      | 1.63 | 0.008       | 2099        |      |
|            | KEGG_ONE_CARBON_POOL_BY_FOLATE                   | 17                                                      | 1.77 | 0.01        | 3855        |      |
|            | KEGG_BUTANOATE_METABOLISM                        | 32                                                      | 1.79 | 0.012       | 2779        |      |
|            | KEGG_CITRATE_CYCLE_TCA_CYCLE                     | 29                                                      | 1.75 | 0.012       | 3918        |      |
|            | KEGG_THYROID_CANCER                              | 29                                                      | 1.72 | 0.012       | 1389        |      |
|            | KEGG_CYSTEINE_AND_METHIONINE_METABOLISM          | 33                                                      | 1.64 | 0.014       | 3674        |      |
|            | KEGG_ASCORBATE_AND_ALDARATE_METABOLISM           | 23                                                      | 1.82 | 0.016       | 5073        |      |
|            | KEGG_PEROXISOME                                  | 77                                                      | 1.74 | 0.019       | 3100        |      |
|            | KEGG_AMINO_SUGAR_AND_NUCLEOTIDE_SUGAR_METABOLISM | 42                                                      | 1.67 | 0.022       | 2351        |      |
|            | KEGG_P53_SIGNALING_PATHWAY                       | 67                                                      | 1.56 | 0.023       | 3298        |      |
|            | KEGG_APOPTOSIS                                   | 84                                                      | 1.61 | 0.024       | 3925        |      |
|            | KEGG_UBIQUITIN_MEDIATED_PROTEOLYSIS              | 128                                                     | 1.65 | 0.027       | 3522        |      |
|            | KEGG_INSULIN_SIGNALING_PATHWAY                   | 132                                                     | 1.5  | 0.031       | 4333        |      |
|            | KEGG_CHRONIC_MYELOID_LEUKEMIA                    | 73                                                      | 1.5  | 0.031       | 1910        |      |
|            | KEGG_PYRUVATE_METABOLISM                         | 38                                                      | 1.59 | 0.034       | 4217        |      |
|            | KEGG_BETA_ALANINE_METABOLISM                     | 22                                                      | 1.56 | 0.037       | 2684        |      |
|            | KEGG_GLYOXYLATE_AND_DICARBOXYLATE_METABOLISM     | 15                                                      | 1.55 | 0.037       | 3855        |      |
|            | Low                                              | KEGG COMPLEMENT AND COAGULATION CASCADES                | 64   | -1.96       | 0           | 3693 |
|            |                                                  | KEGG GLYCOSAMINOGLYCAN BIOSYNTHESIS CHONDROITIN SULFATE | 22   | -1.79       | 0.006       | 3857 |
|            |                                                  | KEGG ECM RECEPTOR INTERACTION                           | 83   | -1.83       | 0.011       | 3182 |

**Supplementary Table 4. KEGG pathway analysis for *SLCO4C1* by GSEA.**

| Expression | GS follow link to MSigDB                       | SIZE | NES   | NOM p-vale | RANK AT MAX |
|------------|------------------------------------------------|------|-------|------------|-------------|
| High       | KEGG_NEUROACTIVE_LIGAND_RECEPTOR_INTERACTION   | 233  | 1.81  | 0.004      | 4747        |
|            | KEGG_JAK_STAT_SIGNALING_PATHWAY                | 131  | 1.71  | 0.012      | 2903        |
|            | KEGG_CYTOKINE_CYTOKINE_RECEPTOR_INTERACTION    | 235  | 1.8   | 0.014      | 5129        |
|            | KEGG_COMPLEMENT_AND_COAGULATION_CASCADES       | 64   | 1.74  | 0.018      | 4341        |
|            | KEGG_HEMATOPOIETIC_CELL_LINEAGE                | 80   | 1.77  | 0.023      | 3856        |
|            | KEGG_CALCIIUM_SIGNALING_PATHWAY                | 170  | 1.59  | 0.025      | 1598        |
|            | KEGG_ALDOSTERONE_REGULATED_SODIUM_REABSORPTION | 40   | 1.55  | 0.026      | 2604        |
|            | KEGG_LEUKOCYTE_TRANSENDOTHELIAL_MIGRATION      | 110  | 1.63  | 0.028      | 3687        |
|            | KEGG_ABC_TRANSPORTERS                          | 43   | 1.54  | 0.04       | 1870        |
|            | KEGG_CHEMOKINE_SIGNALING_PATHWAY               | 182  | 1.59  | 0.047      | 4352        |
| Low        | KEGG_SPLICEOSOME                               | 126  | -2    | 0.002      | 4611        |
|            | KEGG_RNA_POLYMERASE                            | 28   | -1.89 | 0.004      | 4331        |
|            | KEGG_BASE_EXCISION_REPAIR                      | 33   | -1.79 | 0.004      | 3245        |
|            | KEGG_PYRIMIDINE_METABOLISM                     | 96   | -1.73 | 0.016      | 4447        |
|            | KEGG_NUCLEOTIDE_EXCISION_REPAIR                | 44   | -1.71 | 0.017      | 3718        |
|            | KEGG_RIBOSOME                                  | 87   | -1.76 | 0.023      | 3104        |
|            | KEGG_PENTOSE_PHOSPHATE_PATHWAY                 | 26   | -1.58 | 0.043      | 3562        |

**Supplementary Table 5. KEGG pathway analysis for *TMEM220* by GSEA.**

| Expression                                   | GS follow link to MSigDB                           | SIZE  | NES   | NOM p-vale | RANK AT MAX |
|----------------------------------------------|----------------------------------------------------|-------|-------|------------|-------------|
| High                                         | KEGG_CALCIIUM_SIGNALING_PATHWAY                    | 170   | 1.97  | 0          | 4043        |
|                                              | KEGG_NEUROACTIVE_LIGAND_RECEPTOR_INTERACTION       | 233   | 1.88  | 0          | 4071        |
|                                              | KEGG_LONG_TERM_POTENTIATION                        | 67    | 1.8   | 0.002      | 3455        |
|                                              | KEGG_DRUG_METABOLISM_CYTOCHROME_P450               | 63    | 1.76  | 0.007      | 5236        |
|                                              | KEGG_VASCULAR_SMOOTH_MUSCLE_CONTRACTION            | 110   | 1.75  | 0.007      | 2795        |
|                                              | KEGG_ETHER_LIPID_METABOLISM                        | 32    | 1.65  | 0.01       | 1224        |
|                                              | KEGG_STEROID_HORMONE_BIOSYNTHESIS                  | 51    | 1.79  | 0.011      | 4850        |
|                                              | KEGG_HEMATOPOIETIC_CELL_LINEAGE                    | 80    | 1.75  | 0.016      | 3753        |
|                                              | KEGG_LEUKOCYTE_TRANSENDOTHELIAL_MIGRATION          | 110   | 1.67  | 0.016      | 3995        |
|                                              | KEGG_COMPLEMENT_AND_COAGULATION_CASCADES           | 64    | 1.74  | 0.019      | 4212        |
|                                              | KEGG_NITROGEN_METABOLISM                           | 23    | 1.67  | 0.019      | 3231        |
|                                              | KEGG_GLYCOSPHINGOLIPID_BIOSYNTHESIS_GANGLIO_SERIES | 15    | 1.63  | 0.025      | 2056        |
|                                              | KEGG_LONG_TERM_DEPRESSION                          | 64    | 1.55  | 0.029      | 3150        |
|                                              | KEGG_CYTOKINE_CYTOKINE_RECEPTOR_INTERACTION        | 235   | 1.67  | 0.034      | 6138        |
|                                              | KEGG_HYPERTROPHIC_CARDIOMYOPATHY_HCM               | 79    | 1.56  | 0.035      | 4984        |
|                                              | KEGG_ALDOSTERONE_REGULATED_SODIUM_REABSORPTION     | 40    | 1.53  | 0.035      | 3215        |
|                                              | KEGG_TASTE_TRANSDUCTION                            | 40    | 1.65  | 0.037      | 3718        |
| Low                                          | KEGG_NON_HOMOLOGOUS_END_JOINING                    | 11    | -1.82 | 0.002      | 3947        |
|                                              | KEGG_AMINOACYL_TRNA_BIOSYNTHESIS                   | 22    | -1.85 | 0.004      | 2245        |
|                                              | KEGG_SPLICEOSOME                                   | 126   | -2.05 | 0.006      | 3198        |
|                                              | KEGG_RNA_POLYMERASE                                | 28    | -1.8  | 0.01       | 3617        |
|                                              | KEGG_NUCLEOTIDE_EXCISION_REPAIR                    | 44    | -1.81 | 0.014      | 4043        |
|                                              | KEGG_CELL_CYCLE                                    | 124   | -1.84 | 0.016      | 4208        |
|                                              | KEGG_BASAL_TRANSCRIPTION_FACTORS                   | 34    | -1.72 | 0.022      | 3845        |
|                                              | KEGG_BASE_EXCISION_REPAIR                          | 33    | -1.68 | 0.022      | 4083        |
| KEGG_RNA_DEGRADATION                         | 53                                                 | -1.63 | 0.029 | 5314       |             |
| KEGG_GLYOXYLATE_AND_DICARBOXYLATE_METABOLISM | 15                                                 | -1.63 | 0.029 | 2112       |             |

**Supplementary Table 6. Primers used in this study.**

| <b>variable</b> | <b>Gene name</b> | <b>Primer</b> | <b>5'-3'Sequence</b>     | <b>size</b> |
|-----------------|------------------|---------------|--------------------------|-------------|
| qPCR            | TMEM220          | Forward       | AGATGCAGAGGTGTGGGTG      | 169bp       |
|                 |                  | Reverse       | ACGATGCAAGAGGTAGGACG     |             |
|                 | CBLN2            | Forward       | GCACCATGACCATCTATTTTCGAC | 266bp       |
|                 |                  | Reverse       | ATGCACTTTGTCTTCCCTTTCC   |             |
|                 | SLCO4C1          | Forward       | GGAGTTGCACTTACGCTGAG     | 237bp       |
|                 |                  | Reverse       | CTTTGGCTTCCTGTGTGCAA     |             |
| MSP             | TMEM220 M        | Forward       | TAAGGTATCGAAATCGAGGC     | 141bp       |
|                 |                  | Reverse       | CAACGCTAACGCCATAACT      |             |
|                 | TMEM220 U        | Forward       | TTTTAAGGTATTGAAATTGAGGT  | 141bp       |
|                 |                  | Reverse       | CCACAACACTAACACCATAACT   |             |
|                 | CBLN2 M          | Forward       | TGTGTAAACGTTGTGTGCGAC    | 107bp       |
|                 |                  | Reverse       | CGCCTAATTTCCGAATCT       |             |
|                 | CBLN2 U          | Forward       | GTTTGTGTAAATGTTGTGTTGAT  | 107bp       |
|                 |                  | Reverse       | CCACCTAATTTCCAAATCTC     |             |
